# Supplementary material for: Particle size effect on the photocatalytic kinetics of barium titanate powders
Source: Royal Society of Chemistry journal article supplement (doi:10.1039/d0cy01358g), 2020-01-01
Supplement: d0cy01358g1.pdf [file d0cy01358g1.pdf]

## Supporting Information

### Particle size effect on the photocatalytic kinetics of barium titanate powders

Ifeanyichukwu C. Amaechi<sup>1</sup>, Rajesh Katoch<sup>1</sup>, Gitanjali Kolhatkar<sup>2</sup>, Shuhui Sun<sup>1</sup>, and  
Andreas Ruediger<sup>1\*</sup>

<sup>1</sup>Institut National de la Recherche Scientifique, Centre Énergie, Matériaux & Télécommunications, 1650 Boulevard Lionel-Boulet, Varennes, Québec, J3X 1S2, Canada.

<sup>2</sup>Nanoelectronics, Faculty of Engineering, Kiel University, 24143 Kiel, Germany.

\* Corresponding author: [ruediger@emt.inrs.ca](mailto:ruediger@emt.inrs.ca)

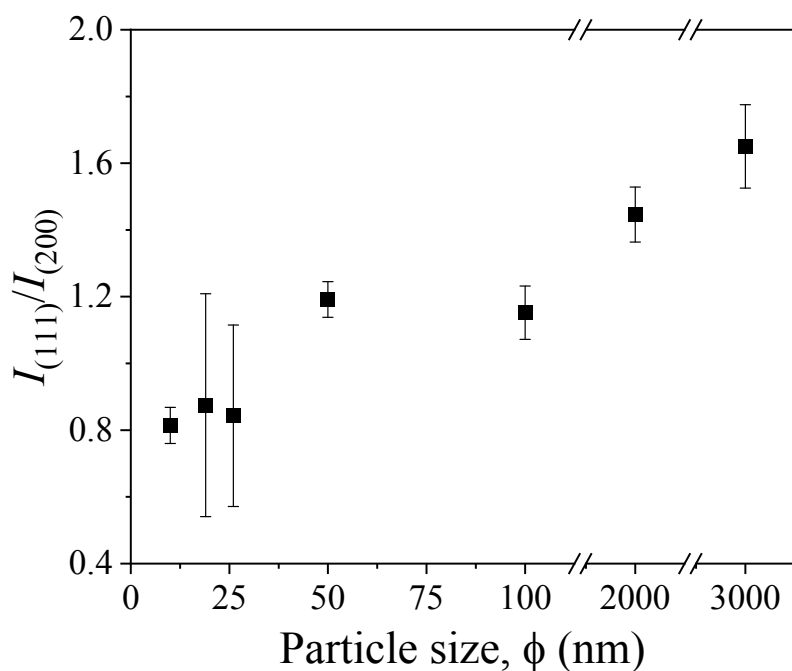

**Figure S1:** Estimation of tetragonality by the method proposed by Hayashi et al [1].

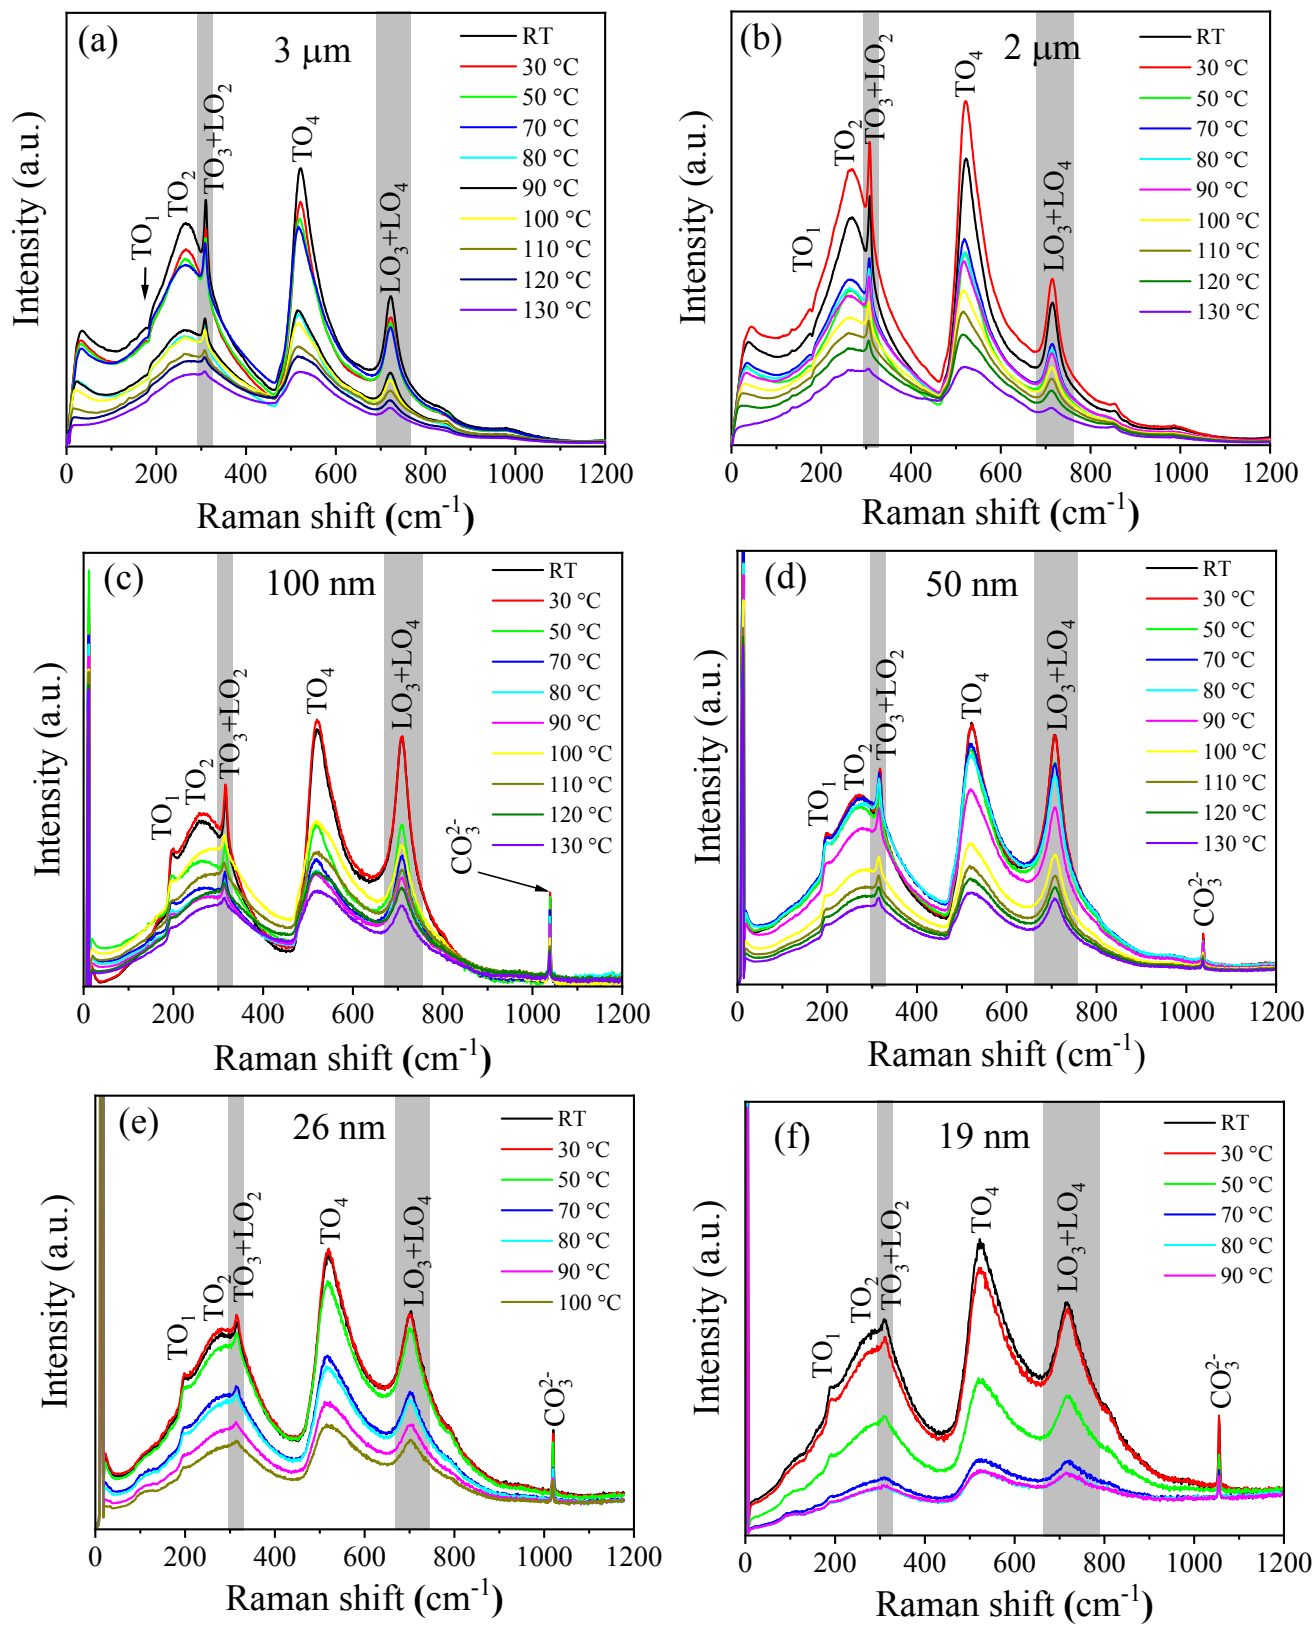

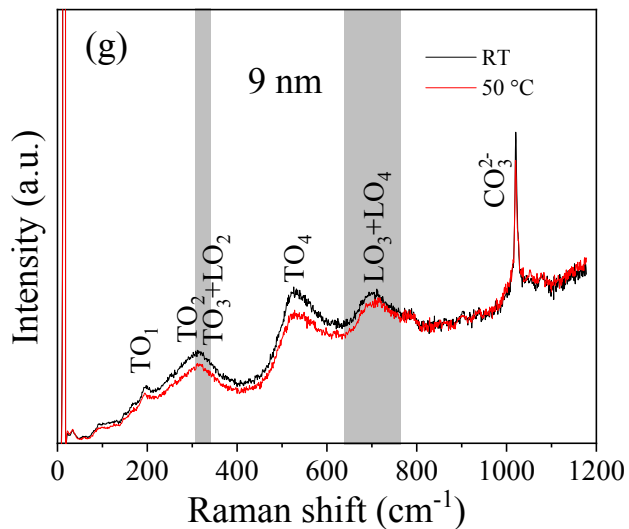

**Figure S2:** Temperature dependent Raman spectra of the powders.

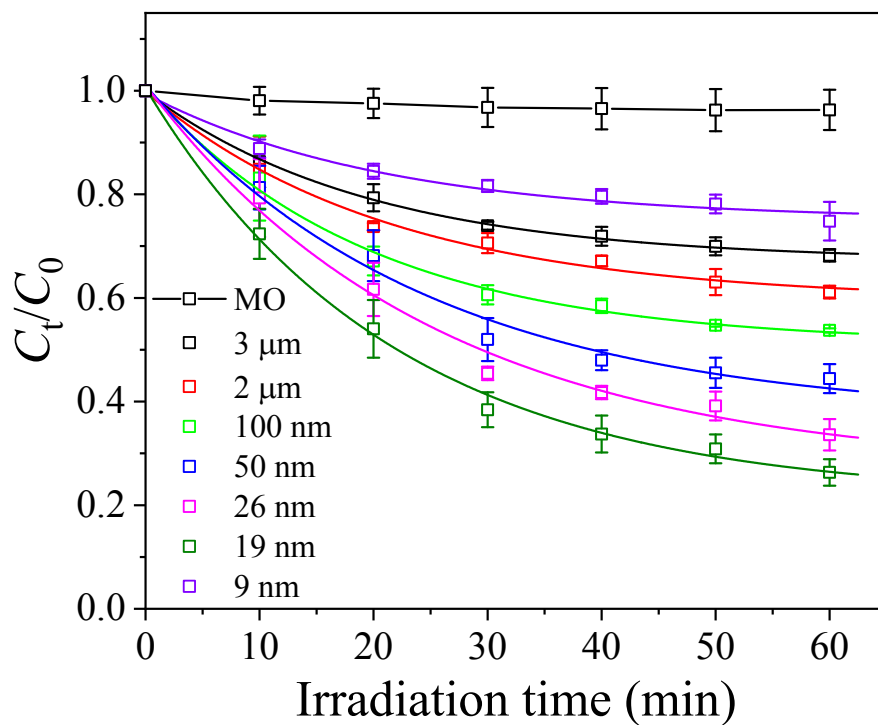

**Figure S3:** Photochemical catalysis of methyl orange over barium titanate powders.

## References

[1] H. Hayashi, T. Nakamura, T. Ebina, In-situ Raman spectroscopy of BaTiO<sub>3</sub> particles for tetragonal–cubic transformation, *J. Phys. Chem. Solids*, 74 (2013) 957-962.
